# Supplementary material for: Construct validity and factor structure of sense of coherence (SoC-13) scale as a measure of resilience in Eritrean refugees living in Ethiopia
Source: Confl Health. 2019 Feb 6;13:3. doi: 10.1186/s13031-019-0185-1 (PMC6366046; doi:10.1186/s13031-019-0185-1)
Supplement: Supplementary file 3 — Table S2. Item- total correlation and Item level Content Validity Index(I-CVI) for each items of SoC-13 scale (DOCX 14 kb) [file 13031_2019_185_MOESM3_ESM.docx]

Supplement Table-2: item- total correlation and Item level Content Validity Index( I-CVI) for each items of SoC-13 scale

| | | Items | | | 1 | 2 | 3 | 4 | 5 | 6 | 7 | 8 | 9 | 10 | 11 | 12 | 13 | | --- | --- | --- | --- | --- | --- | --- | --- | --- | --- | --- | --- | --- | --- | --- | --- | | Item- total  Correlation | Pilot study (n=52) | | 0.27 | 0.32 | 0.37 | 0.53 | 0.48 | 0.65 | 0.41 | 0.50 | 0.58 | 0.63 | 0.45 | 0.10 | 0.52 | | Main study(n=562) | | 0.24 | 0.26 | 0.36 | 0.57 | 0.45 | 0.58 | 0.47 | 0.64 | 0.65 | 0.66 | 0.56 | 0.33 | 0.63 | | Alpha if item deleted | Main study(n=562) | | 0.76 | 0.75 | 0.73 | 0.71 | 0.72 | 0.71 | 0.72 | 0.70 | 0.70 | 0.70 | 0.71 | 0.74 | 0.70 | | I-CVI | | Main study (n=562) | 1 | 1 | 1 | 1 | 0.86 | 1 | 1 | 1 | 1 | 1 | 1 | 1 | 1 | | | --- | --- | --- | --- | --- | --- | --- | --- | --- | --- | --- | --- | --- | --- | --- | --- | --- | --- | --- | --- | --- | --- | --- | --- | --- | --- | --- | --- | --- | --- | --- | --- | --- | --- | --- | --- | --- | --- | --- | --- | --- | --- | --- | --- | --- | --- | --- | --- | --- | --- | --- | --- | --- | --- | --- | --- | --- | --- | --- | --- | --- | --- | --- | --- | --- | --- | --- | --- | --- | --- | --- | --- | --- | --- | --- | --- | --- | --- | --- | --- | |
| --- | --- | --- | --- | --- | --- | --- | --- | --- | --- | --- | --- | --- | --- | --- | --- | --- | --- | --- | --- | --- | --- | --- | --- | --- | --- | --- | --- | --- | --- | --- | --- | --- | --- | --- | --- | --- | --- | --- | --- | --- | --- | --- | --- | --- | --- | --- | --- | --- | --- | --- | --- | --- | --- | --- | --- | --- | --- | --- | --- | --- | --- | --- | --- | --- | --- | --- | --- | --- | --- | --- | --- | --- | --- | --- | --- | --- | --- | --- | --- | --- |

Abbreviations: Item level Content Validity index(I-CVI)=.86-1 ;CVI-S-Scale level Content Validity Index (S-CVI)= 0.92,

Average Scale- Level Content Vaidity Index (S-CVI/Ave) = 0.989
