# Supplementary material for: Construct validity and factor structure of sense of coherence (SoC-13) scale as a measure of resilience in Eritrean refugees living in Ethiopia
Source: Confl Health. 2019 Feb 6;13:3. doi: 10.1186/s13031-019-0185-1 (PMC6366046; doi:10.1186/s13031-019-0185-1)
Supplement: Supplementary file 4 — Table S4. Mean score comparison of SoC-13 between two studies from Eritrean sample. (DOCX 17 kb) [file 13031_2019_185_MOESM4_ESM.docx]

Table-5: Mean score comparison of SoC-13 between two studies from Eritrean sample

|  |  |  |
| --- | --- | --- |
| | Study | Participants | Sample size | Mean(SD) | Median | Range | Reliability  Alpha | Split half reliability | | --- | --- | --- | --- | --- | --- | --- | --- | | Present  Study | Eritrean  Refugees in Ethiopia | Total sample  (n=562) | 38.91(8.66) | 38 | 15- 63 | 0.74 | 0.69 | | Male(n=258) | 39.89(8.73) | 40 | 18-60 | 0.72 | 0.71 | | Female(n=304) | 38.08(8.53) | 37.5 | 15-63 | 0.75 | 0.66 | | Alemdom, et al.,2007* | Eritrean  IDP | Total sample  (n=72) | 48.94 |  |  |  |  | | Male(n=40) | 52.5 |  |  |  |  | | Female(n=32) | 41.18 |  |  |  |  | | Eritrean  Non-displaced | Total sample  (N=193) | 54.84 |  |  |  |  | | Male(n=63) | 53.61 |  |  |  |  | | Female(n=130) | 54.66 |  |  |  |  | |  |  |  |  |  |  |   Note: IDP (Internally Displaced Persons); shaded= not reported  *Almedom A, Tesfamichael B, Saeed Z, et al: use of ‘sense of coherence (SoC)’ scale to measure resilience in Eritrea: Interrogating both the data and the scale. J.biosoc.Sci, 2007; 39, 91–107 |  |  |
